# Supplementary material
Source: PubMed Central journal article supplement (PMC2775660)
Supplement: jc.2009-0089_2.pdf [file jc.2009-0089_2.pdf]

**SUPPLEMENT TABLE 1. Multiple regression analyses testing the relationship of Dietary AGE intake with anti-OS, AGER1 or pro-OS RAGE, p66<sup>shc</sup>, 8-isoprostanes and VCAM-1**

|                                | AGER1*         |       | RAGE*          |       | P66 <sup>shc</sup> * |      | 8-isoprostane  |       | VCAM-1         |      |
|--------------------------------|----------------|-------|----------------|-------|----------------------|------|----------------|-------|----------------|------|
|                                | $\beta \pm SE$ | p     | $\beta \pm SE$ | p     | $\beta \pm SE$       | p    | $\beta \pm SE$ | p     | $\beta \pm SE$ | p    |
| <b>Age</b>                     | -.089±1.198    | .595  | .137±.881      | .382  | -.311±.099           | .061 | -.110±.675     | .431  | .110±1.4       | .325 |
| <b>Gender</b>                  | -.013±.093     | .926  | .178±1.34      | .185  | -.104±3.79           | .456 | .099±.803      | .425  | -.072±56.9     | .498 |
| <b>AGE intake (Eq/d)</b>       | .422±2.91      | 0.022 | .554±5.86      | 0.002 | .143±.240            | .016 | .252±1.86      | 0.020 | .362±3.6       | .001 |
| <b>Caloric intake (kcal/d)</b> | -.263±.051     | .136  | -.122±.103     | .454  | .159±.004            | .348 | -0.051±.027    | .277  | -.069±.053     | .563 |
| <b>GFR (ml/min)</b>            | -.088±.789     | .590  | .090±1.59      | .558  | -.118±.065           | .460 | .151±.420      | .718  | .083±.757      | .447 |

\* AGER1, RAGE and p66<sup>shc</sup> mRNA, shown as number of gene copies, based on RT-PCR of PMNC
