# Supplementary material
Source: PubMed Central journal article supplement (PMC2775660)
Supplement: jc.2009-0089_3.pdf [file jc.2009-0089_3.pdf]

**SUPPLEMENT TABLE 2A: Changes in Selected Parameters During a 4-month Dietary AGE Intervention in Healthy Subjects (n=40)**

|                                           | Low AGE diet |            | Regular AGE diet |            | P*    |
|-------------------------------------------|--------------|------------|------------------|------------|-------|
|                                           | First visit  | Last visit | First visit      | Last visit |       |
| <b>dAGE</b><br>(AGE Eq/day)               | 20±2         | 10±2       | 20±5             | 20±6       | 0.000 |
| <b>dCal</b><br>(kcal/day)                 | 2625±243     | 2118±253   | 2271±397         | 2268±461   | 0.977 |
| <b>sCML</b><br>(u/ml)                     | 14±1         | 9±1        | 11±1             | 13±1       | 0.000 |
| <b>sMG</b><br>(nmol/ml)                   | 1.2±0.1      | 0.8±0.1    | 1±0.1            | 1.1±0.1    | 0.000 |
| <b>8-isoprostane</b><br>(ng/ml)           | 240±67       | 100±13     | 122±4            | 173±38     | 0.047 |
| <b>VCAM-1</b><br>(ng/ml)                  | 1001±115     | 576±49     | 717±68           | 771±58     | 0.041 |
| <b>TNF-α</b><br>(ng/mg prot)              | 12±1         | 8±0.5      | 9± 1             | 12±1       | 0.001 |
| <b>AGER1</b><br>(gene copies)             | 288±44       | 204±47     | 252±40           | 227±35     | 0.043 |
| <b>RAGE</b><br>(gene copies)              | 699±101      | 368±66     | 426±57           | 602±87     | 0.025 |
| <b>p66<sup>shc</sup></b><br>(gene copies) | 64±9         | 40±5       | 45±5             | 65±5       | 0.004 |
| <b>Glucose</b><br>(mg/dl)                 | 81±3         | 78±3       | 84±3             | 79±3       | 0.292 |
| <b>Triglycerides</b><br>(mg/dl)           | 67±16        | 51±4       | 93±17            | 84±14      | 0.686 |
| <b>HDL cholesterol</b><br>(mg/dl)         | 68±5         | 62±6       | 74±5             | 73±6       | 0.916 |
| <b>LDL cholesterol</b><br>(mg/dl)         | 89±10        | 76±12      | 103±6            | 106±8      | 0.328 |
| <b>Weight</b><br>(kgs)                    | 82±4         | 83±4       | 78±4             | 75±4       | 0.522 |
| <b>BMI</b><br>(kg/m <sup>2</sup> )        | 28±2         | 27±2       | 28±2             | 26±1       | 0.441 |
| <b>CreatClearance</b><br>(ml/min)         | 99±12        | 118±15     | 115±10           | 100±8      | 0.163 |
| <b>Systolic BP</b><br>(mmHg)              | 125±4        | 126±3      | 118±4            | 119±4      | 0.481 |
| <b>Diastolic BP</b><br>(mmHg)             | 73±3         | 72±2       | 64±3             | 68±2       | 0.840 |

dAGE= daily dietary AGE intake; dCal=daily caloric intake; AGER1, RAGE and p66<sup>shc</sup> mRNA were assessed by RT-PCR as discussed in methods; p\* denotes statistical significant differences of the percent change between baseline and end of the study values when comparing subjects in the low and regular AGE diets based on Mann-Whitney test.

**SUPPLEMENT TABLE 2B: Changes in Selected Parameters During a 4-week Dietary AGE Intervention in CKD patients (n=9)**

|                                           | Low AGE diet |            | Regular AGE diet |            | P*    |
|-------------------------------------------|--------------|------------|------------------|------------|-------|
|                                           | First visit  | Last visit | First visit      | Last visit |       |
| <b>dAGE</b><br>(AGE Eq/day)               | 16±3         | 8±2        | 13±3             | 12±3       | 0.000 |
| <b>dCal</b><br>(kcal/day)                 | 1720±140     | 1680±170   | 1650±210         | 1723±190   | 0.876 |
| <b>sCML</b><br>(u/ml)                     | 25±3         | 14±2       | 19±4             | 17±3       | 0.016 |
| <b>sMG</b><br>(nmol/ml)                   | 3.1±0.4      | 2.3±0.3    | 2.5±0.4          | 2.0±0.1    | 0.567 |
| <b>8-isoprostane</b><br>(ng/ml)           | 328±51       | 154±25     | 211±7            | 167±21     | 0.017 |
| <b>VCAM-1</b><br>(ng/ml)                  | 1033±168     | 733±52     | 1086±210         | 956±133    | 0.291 |
| <b>TNF-α</b><br>(ng/mg prot)              | 22±4         | 16±3       | 15±4             | 16±3       | 0.037 |
| <b>AGER1</b><br>(gene copies)             | 82±10        | 134±18     | 63±10            | 65±10      | 0.014 |
| <b>RAGE</b><br>(gene copies)              | 589±111      | 253±61     | 363±7            | 314±11     | 0.117 |
| <b>p66<sup>shc</sup></b><br>(gene copies) | 136±26       | 106±15     | 195±65           | 105±40     | 0.398 |
| <b>Glucose</b><br>(mg/dl)                 | 89±3         | 90±3       | 93±2             | 80±4       | 0.876 |
| <b>Triglycerides</b><br>(mg/dl)           | 94±42        | 88±16      | 225±26           | 225±41     | 0.657 |
| <b>HDL cholesterol</b><br>(mg/dl)         | 59±6         | 54±4       | 41±3             | 39±4       | 0.754 |
| <b>LDL cholesterol</b><br>(mg/dl)         | 89±6         | 83±6       | 115±17           | 97±14      | 0.838 |
| <b>Weight</b><br>(kgs)                    | 66.5±9       | 64±9       | 79±8             | 78±7       | 0.420 |
| <b>BMI</b><br>(kg/m <sup>2</sup> )        | 23±1.6       | 22±1.6     | 28±1.9           | 27±1.7     | 0.560 |
| <b>CreatClearance</b><br>(ml/min)         | 39.5±11      | 36±10      | 46.5±15          | 43±11      | 0.672 |
| <b>Systolic BP</b><br>(mmHg)              | 133±8        | 121±8      | 125±5            | 116±2      | 0.550 |
| <b>Diastolic BP</b><br>(mmHg)             | 79±6         | 74±4       | 79±8             | 78±7       | 0.619 |

dAGE= daily dietary AGE intake; dCal=daily caloric intake; AGER1, RAGE and p66<sup>shc</sup> mRNA were assessed by RT-PCR as discussed in methods; p\* denotes statistical significant differences of the percent change between baseline and end of the study values when comparing subjects in the low and regular AGE diets based on Mann-Whitney test.
