# Supplementary material
Source: PubMed Central journal article supplement (PMC2775660)
Supplement: jc.2009-0089_4.pdf [file jc.2009-0089_4.pdf]

**SUPPLEMENT TABLE 3A: Baseline demographic and biochemical parameters in all CKD and in CKD Stage 3 patients**

|                               | <b>All CKD</b> | <b>CKD 3*</b> | <b>P<sup>3</sup></b> | <b>P<sup>4</sup></b> |
|-------------------------------|----------------|---------------|----------------------|----------------------|
| <b>Age (yrs)</b>              | 59±2           | 62±3          | .000                 | .000                 |
| <b>BMI (kg/m<sup>2</sup>)</b> | 27±0.8         | 27±1          | .395                 | .019                 |
| <b>Systolic BP (mmHg)</b>     | 128±3          | 127±5         | .456                 | .002                 |
| <b>Diastolic BP (mmHg)</b>    | 76±2           | 77±3          | .068                 | .007                 |
| <b>Triglycerides (mg/dl)</b>  | 139±11         | 134±23        | .316                 | .000                 |
| <b>HDL chol(mg/dl)</b>        | 56±3           | 58±4          | .453                 | .069                 |
| <b>LDL chol (mg/dl)</b>       | 105±5          | 103±7         | .897                 | .281                 |
| <b>Glucose (mg/dl)</b>        | 90±3           | 89±4          | .765                 | .000                 |
| <b>Creatin Clear (ml/min)</b> | 50±6           | 42±3          | .373                 | .000                 |
| <b>Urine protein (mg/d)</b>   | 1540±3466      | 736±251       | .000                 | .000                 |
| <b>Urine AGE (units/d)*</b>   | 33.5±2.5       | 33.9±3.5      | .134                 | .130                 |

\* urine AGE = units/day x 1000

CKD 3\* = Stage 3 chronic kidney disease patients (GFR between 30-60 ml/min)

**SUPPLEMENT TABLE 3B : Baseline values of sAGEs, AGERs, dAGEs, OS and inflammatory factors in all CKD and in CKD Stage 3 patients**

|                                | <b>All CKD</b> | <b>CKD 3*</b> | <b>P<sup>3</sup></b> | <b>P<sup>4</sup></b> |
|--------------------------------|----------------|---------------|----------------------|----------------------|
| <b>Serum CML (u/ml)</b>        | 18±1           | 18±2          | .070                 | .000                 |
| <b>Serum MG (nmol/ml)</b>      | 2.3±.1         | 2.2±.1        | .000                 | .000                 |
| <b>hsCRP (mg/l)</b>            | 9±2            | 10±3          | .004                 | .002                 |
| <b>Fibrinogen (mg/dl)</b>      | 376±35         | 370±4         | .287                 | .116                 |
| <b>VCAM-1 (ng/ml)</b>          | 1114±45        | 1145±73       | .478                 | .001                 |
| <b>8-isoprostane (ng/ml)</b>   | 312±17         | 343±35        | .129                 | .001                 |
| <b>TNF-α (ng/mg)</b>           | 19±3           | 19±3          | .010                 | .000                 |
| <b>RAGE (gene copies)</b>      | 667±50         | 632±79        | .343                 | .028                 |
| <b>AGER1 (gene copies)</b>     | 79±5           | 83±6          | .000                 | .035                 |
| <b>P66 (gener copies)</b>      | 113±22         | 143±67        | .501                 | .000                 |
| <b>Caloric intake (kcal/d)</b> | 1506±80        | 1549±126      | .070                 | .000                 |
| <b>AGE intake (Eq/d)</b>       | 13±1           | 12±2          | .000                 | .000                 |

CKD 3\* = Stage 3 chronic kidney disease patients (GFR between 30-60 ml/min)
