# Supplementary material
Source: PubMed Central journal article supplement (PMC2775660)

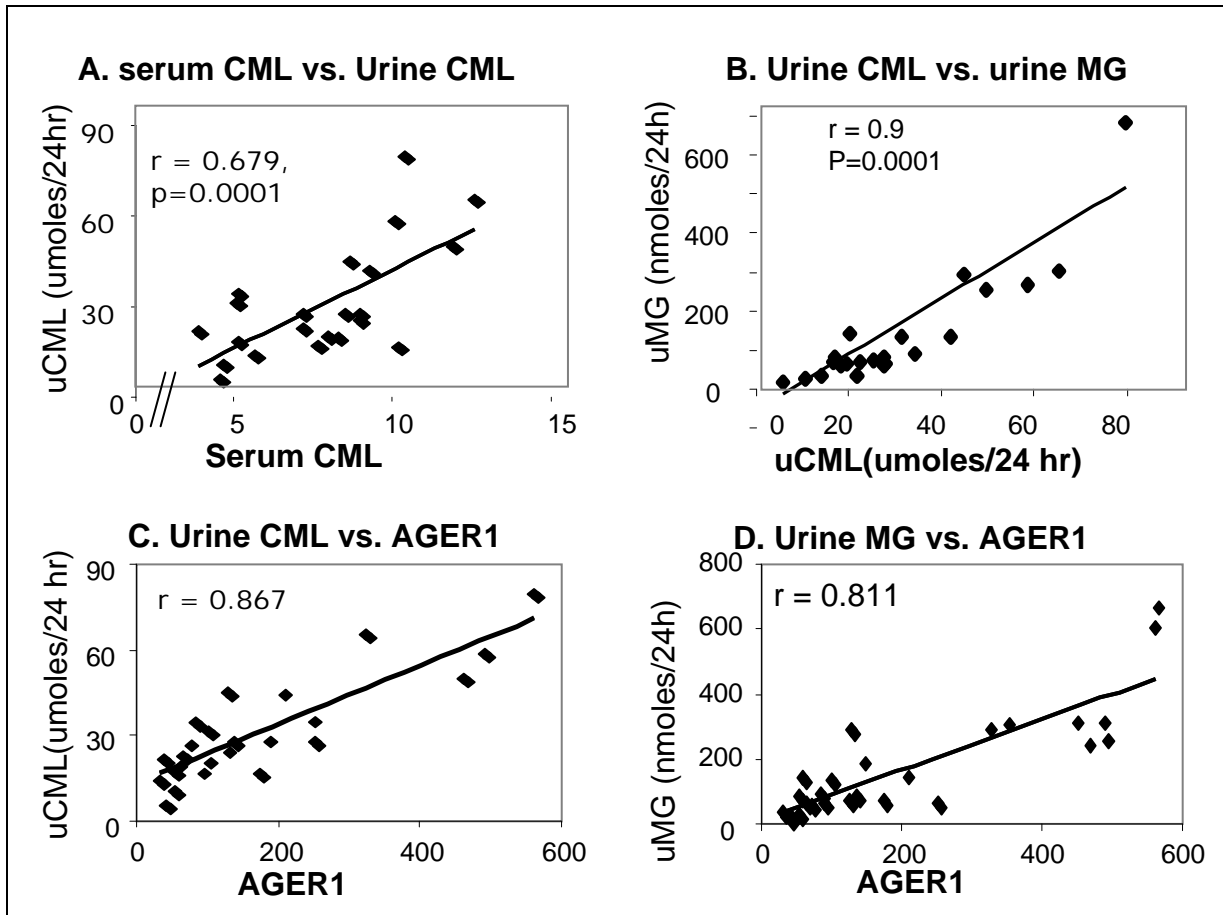

Supplement Figure 1

Supplement: jc.2009-0089_1.pdf [file jc.2009-0089_1.pdf]
